# Supplementary material for: SorLA restricts TNFα release from microglia to shape a glioma-supportive brain microenvironment
Source: PubMed Central journal article supplement (PMC11094098; doi:10.1038/s44319-024-00117-6), 2024-03-18
Supplement: 44319_2024_117_MOESM14_ESM.pdf [file 44319_2024_117_MOESM14_ESM.pdf]

## Expanded View Figures

**Figure EV1. *SORL1* is expressed in GAMs.**

(A) UMAP projection of single cells from human ndGBM tumors described in Abdelfattah et al, grouped in 21 clusters. Clusters identified as GAMs are indicated with purple dashed line. (B, C) UMAP projections presenting expression of *SORL1* (B) and GAMs marker genes (C) in all clusters as exemplified in (A). Expression levels are normalized with SCT. (D) UMAP projection of single cells from human GBM tumors described in Neftel et al, grouped in 21 clusters. Cluster identified as GAMs is indicated with purple dashed line. (E, F) UMAP projections presenting expression of *SORL1* (E) and GAMs marker genes (F) in all clusters as exemplified in (D). Expression levels are normalized with SCT.

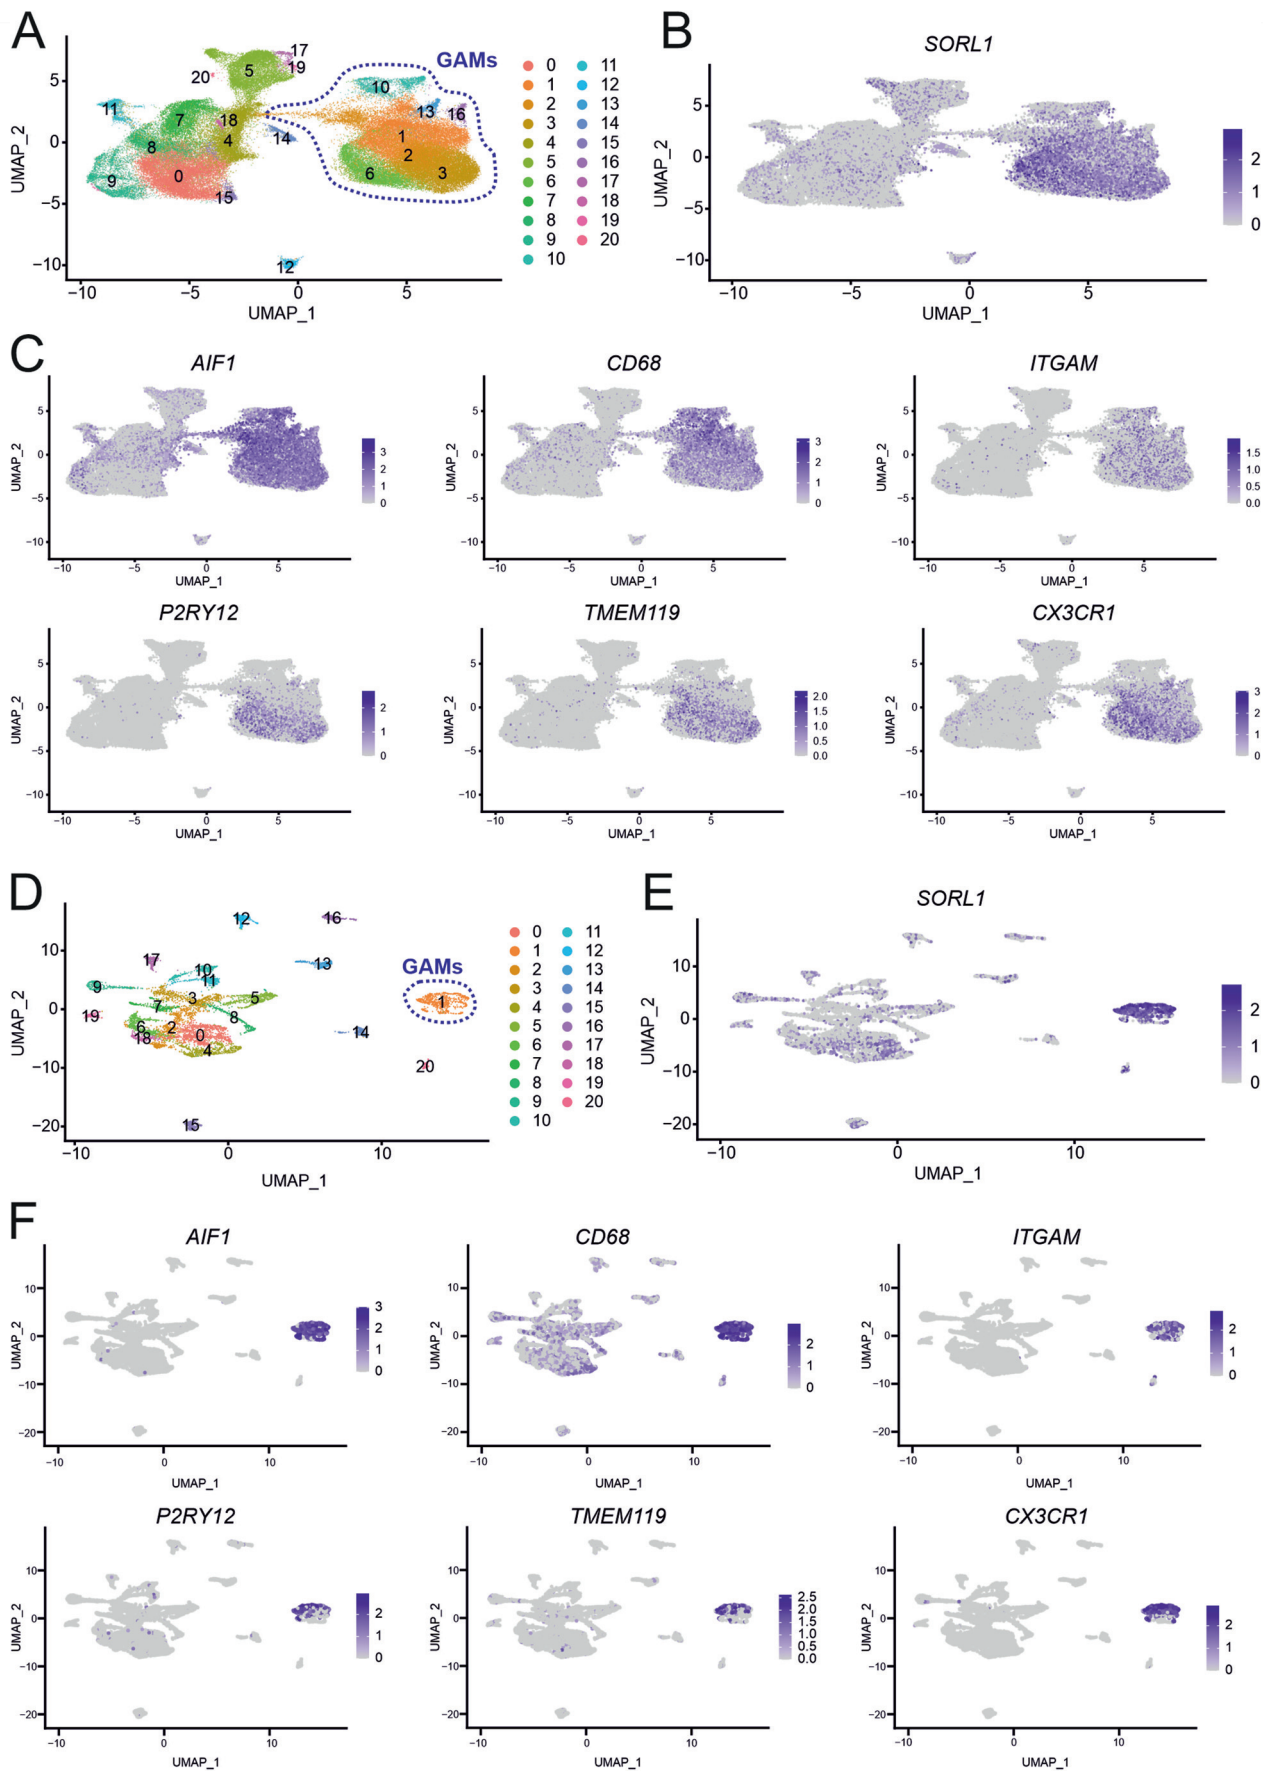

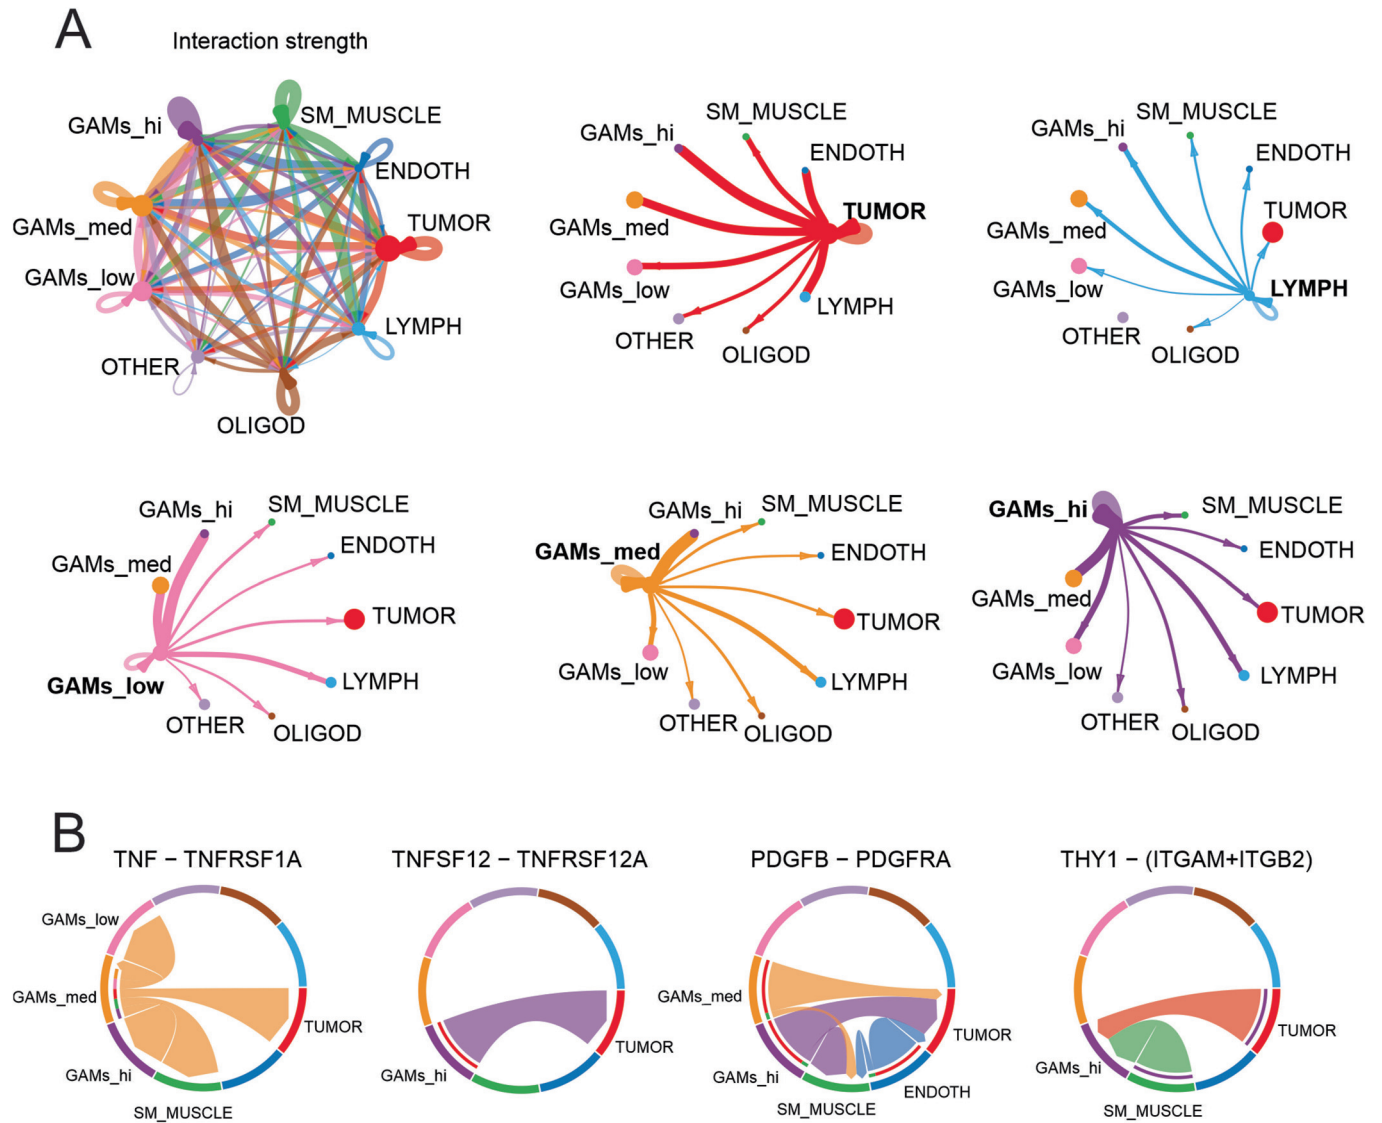

**Figure EV2. Interaction networks between cell populations in newly diagnosed GBM tumors.**

(A) Network plots showing strength of ligand-receptor interactions between cell populations. The line width is proportional to the number of ligand-receptor pairs identified. (B) Chord diagrams indicating selected ligand-receptor pairs mediating interaction between cell populations. Width of chords is proportional to signal strength of the given ligand-receptor pair.

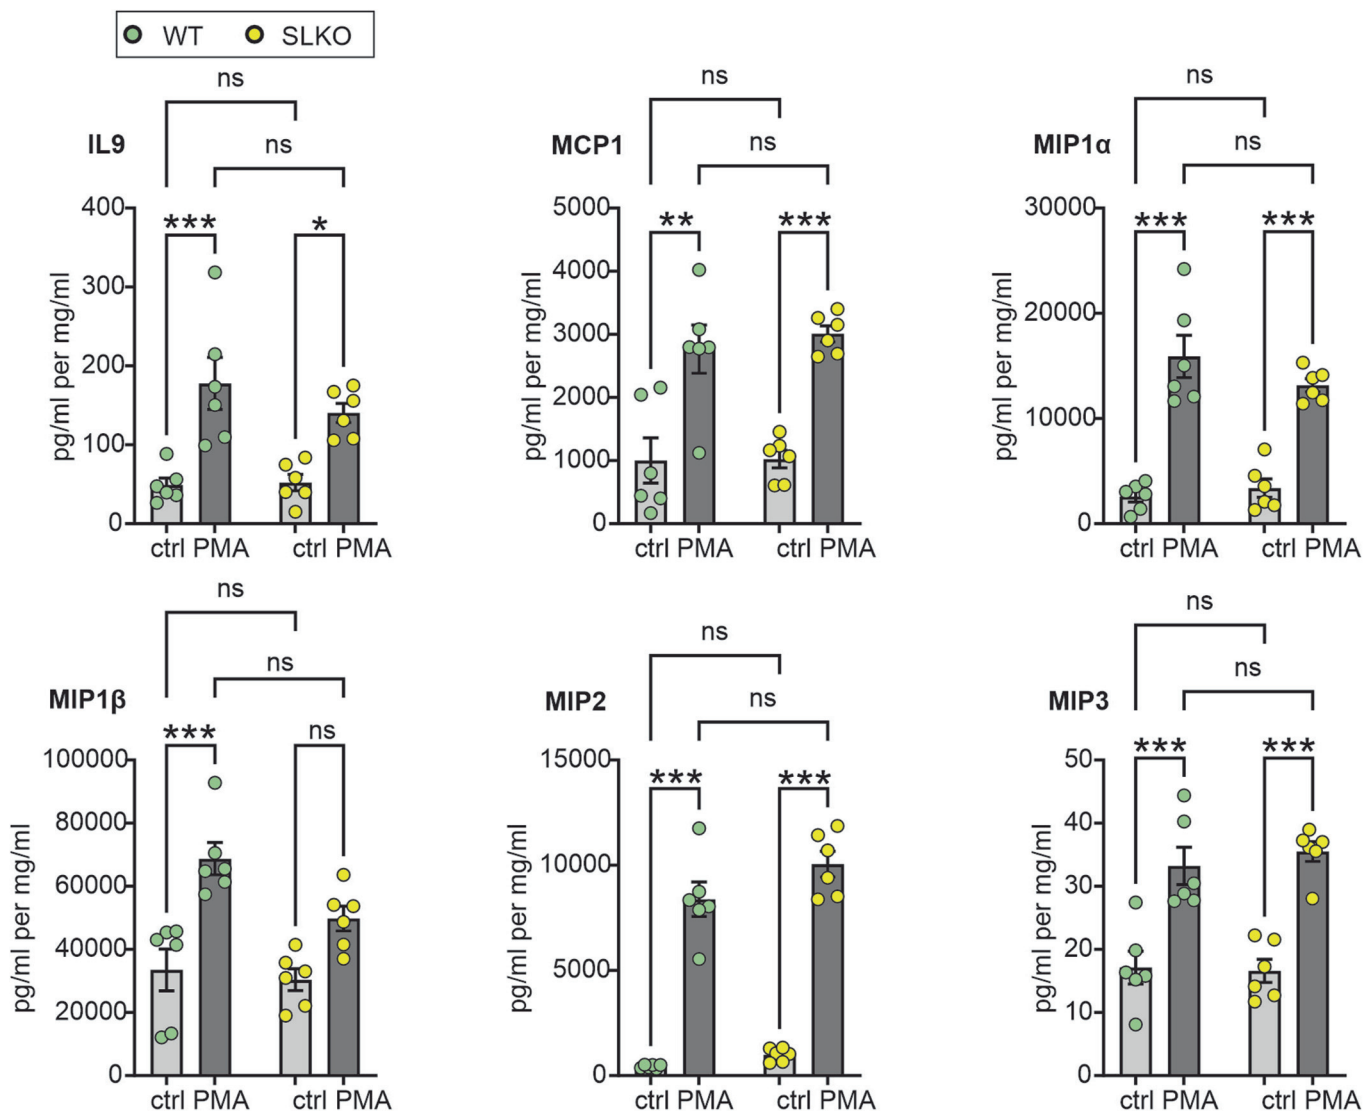

**Figure EV3. SorLA deficiency has no major impact on microglial cytokine secretion.**

Cytokine levels as determined by ELISA in cell culture medium from primary WT and SorLA-KO microglia either untreated (ctrl) or treated with PMA for 24 h. Cytokine levels were normalized to the protein content in the respective cell lysates.  $n = 6$  biological replicates. Data information: data are presented as mean  $\pm$  SEM. ns not significant; \* $P < 0.05$ ; \*\* $P < 0.01$ ; \*\*\* $P < 0.001$  in two-way ANOVA with Tukey's multiple comparisons test.

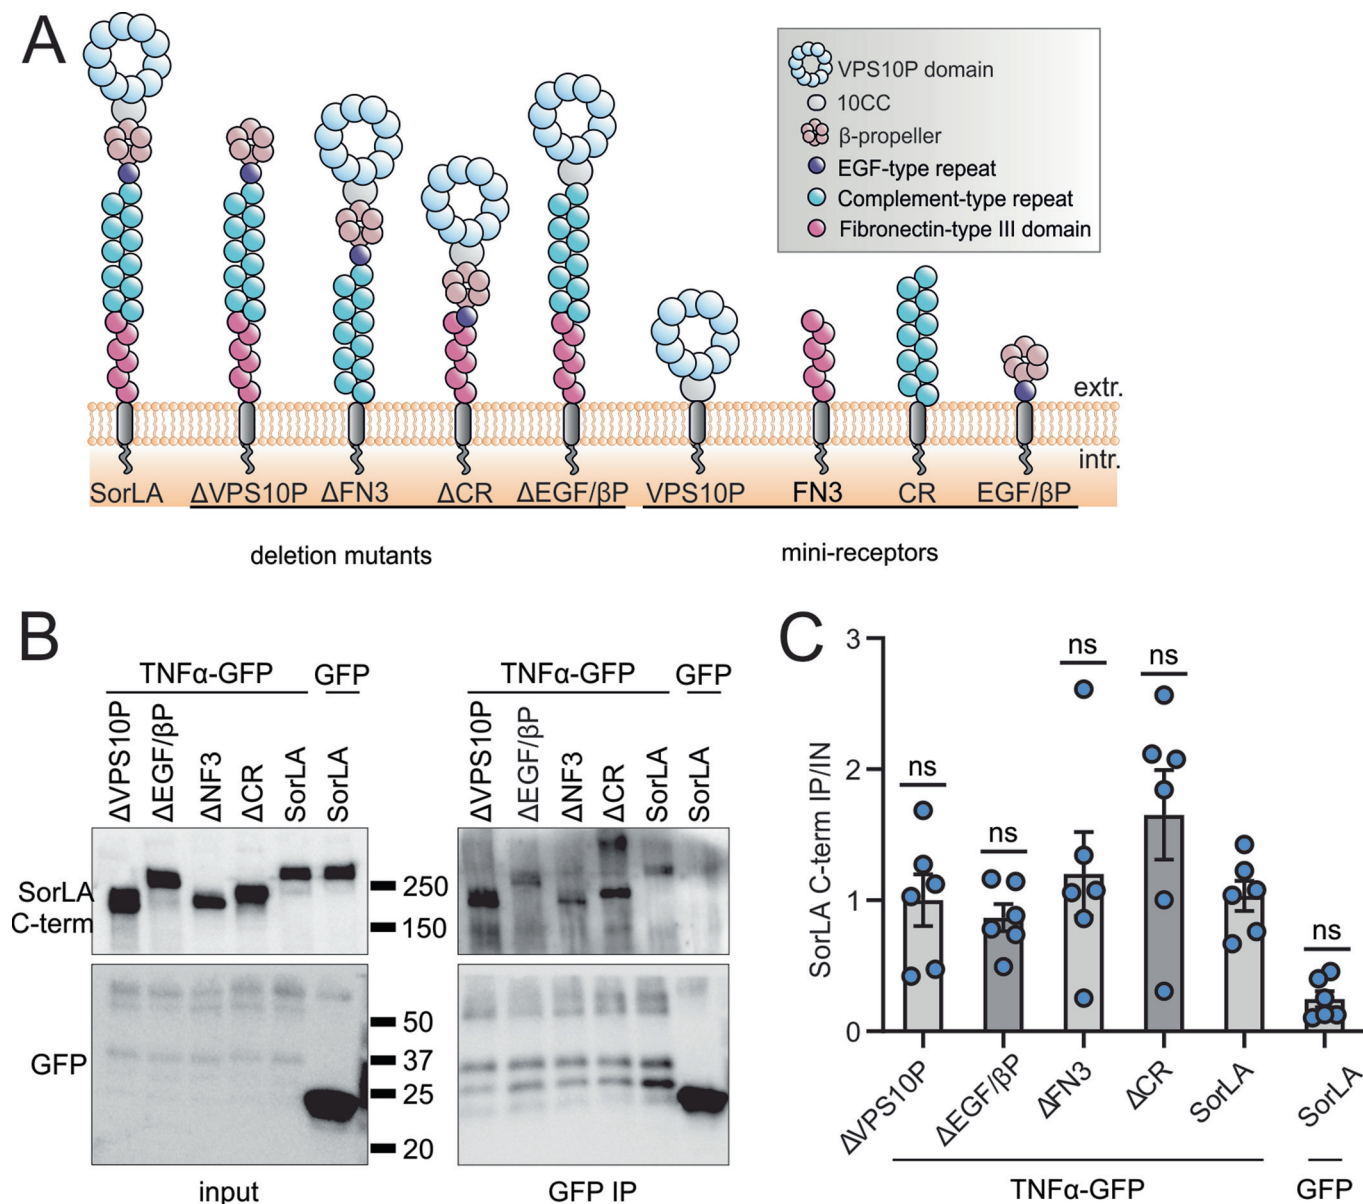

**Figure EV4. Binding of SorLA mutants to TNF $\alpha$ .**

(A) Schematic representation of SorLA structure and the mutant proteins used in this study. (B) Co-immunoprecipitation (co-IP) of SorLA deletion mutants with TNF $\alpha$ -GFP overexpressed in HEK293 cells after GFP-IP. GFP serves as a negative control. SorLA was detected using an antibody raised against its C-terminus. (C) Quantification of the results of 6 biological replicates as exemplified in (B). Ratio of co-IP and input signals (IP/IN) was calculated for each transfection variant. Data information: (C) Data are presented as mean  $\pm$  SEM. ns not significant in one-way ANOVA with Tukey's multiple comparisons test, comparing to full-length SorLA.
